# Supplementary material for: Discovery of Urinary Proteomic Signature for Differential Diagnosis of Acute Appendicitis
Source: Hindawi journal article supplement (doi:10.1155/2020/3896263), 2020-01-01
Supplement: f1 [file 3896263.f1.pdf]

## Protein extraction

Urine collection

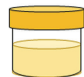

Ultracentrifugation

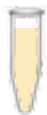

Pellet

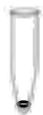

Reduction  
Remove UMOD

Ultracentrifugation

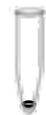

## Protein digestion

In-Gel digestion

F1 {  
F2 {  
F3 {

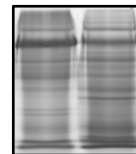

FileMaker iSPEC

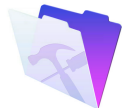

Protein identification

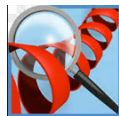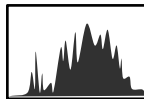

LC-MS/MS

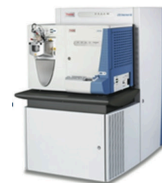

Data output

Protein identification
