# Supplementary material for: Discovery of Urinary Proteomic Signature for Differential Diagnosis of Acute Appendicitis
Source: Hindawi journal article supplement (doi:10.1155/2020/3896263), 2020-01-01

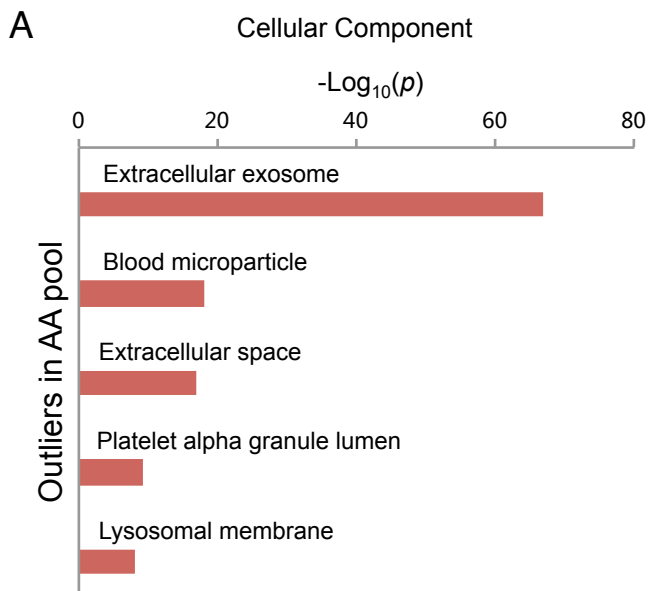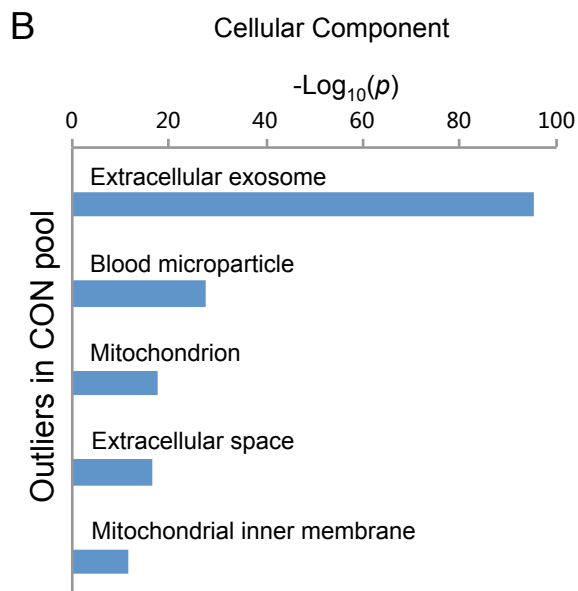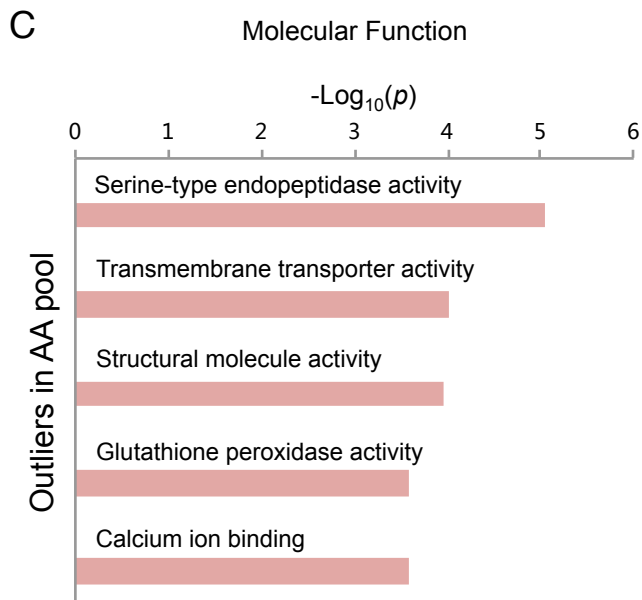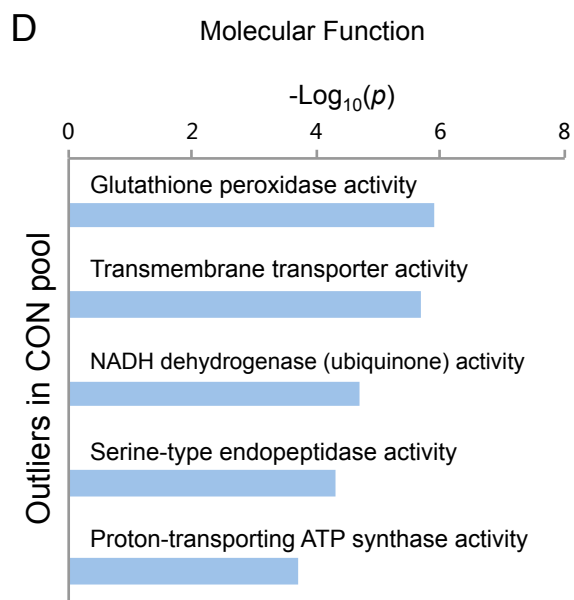

Supplement: f3 [file 3896263.f3.pdf]
