# Supplementary material for: Discovery of Urinary Proteomic Signature for Differential Diagnosis of Acute Appendicitis
Source: Hindawi journal article supplement (doi:10.1155/2020/3896263), 2020-01-01

IYVE1

\*\*

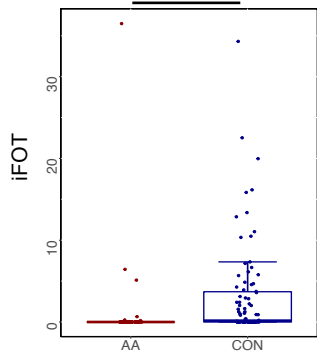

AHCYL1

\*\*

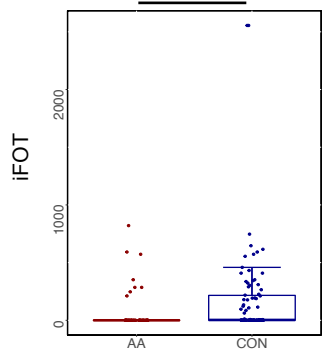

APOC1

\*\*

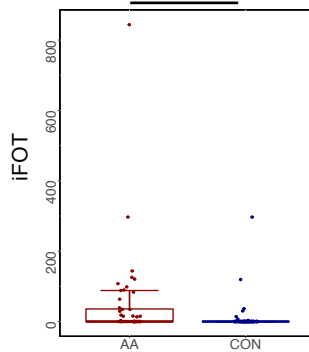

SECTM1

\*\*

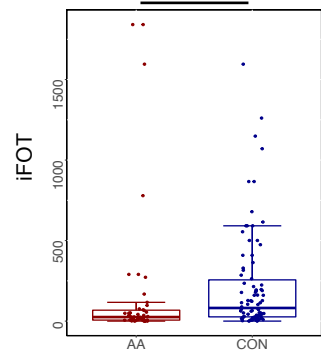

SLC31A1

\*\*

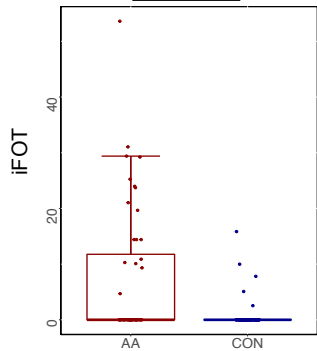

ITGA6

\*\*

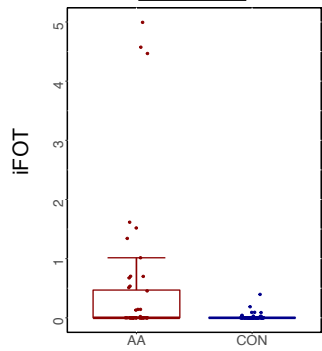

SLC35F2

\*

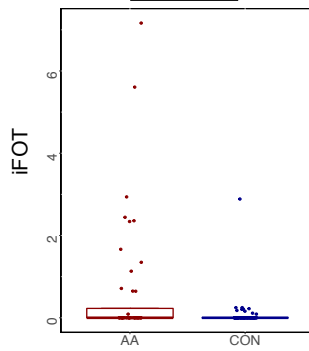

GPX3

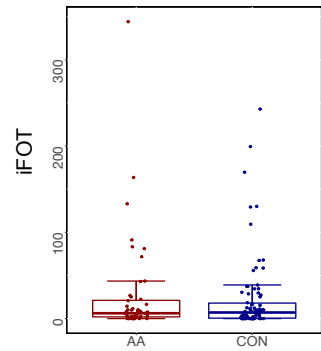

TMEM14C

\*

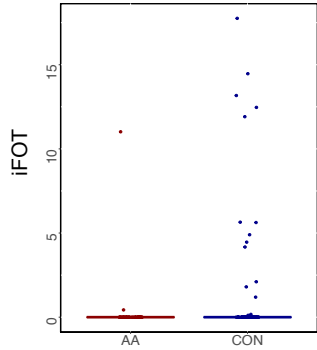

SLC47A2

\*\*

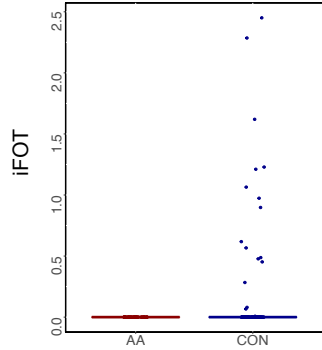

Supplement: f4 [file 3896263.f4.pdf]
